# Supplementary material for: Tuneable oxidation of styrene to benzaldehyde and benzoic acid over Co/ZSM-5
Source: Royal Society of Chemistry journal article supplement (doi:10.1039/d1nj03145g), 2021-01-01
Supplement: d1nj03145g1.pdf [file d1nj03145g1.pdf]

## Supporting information

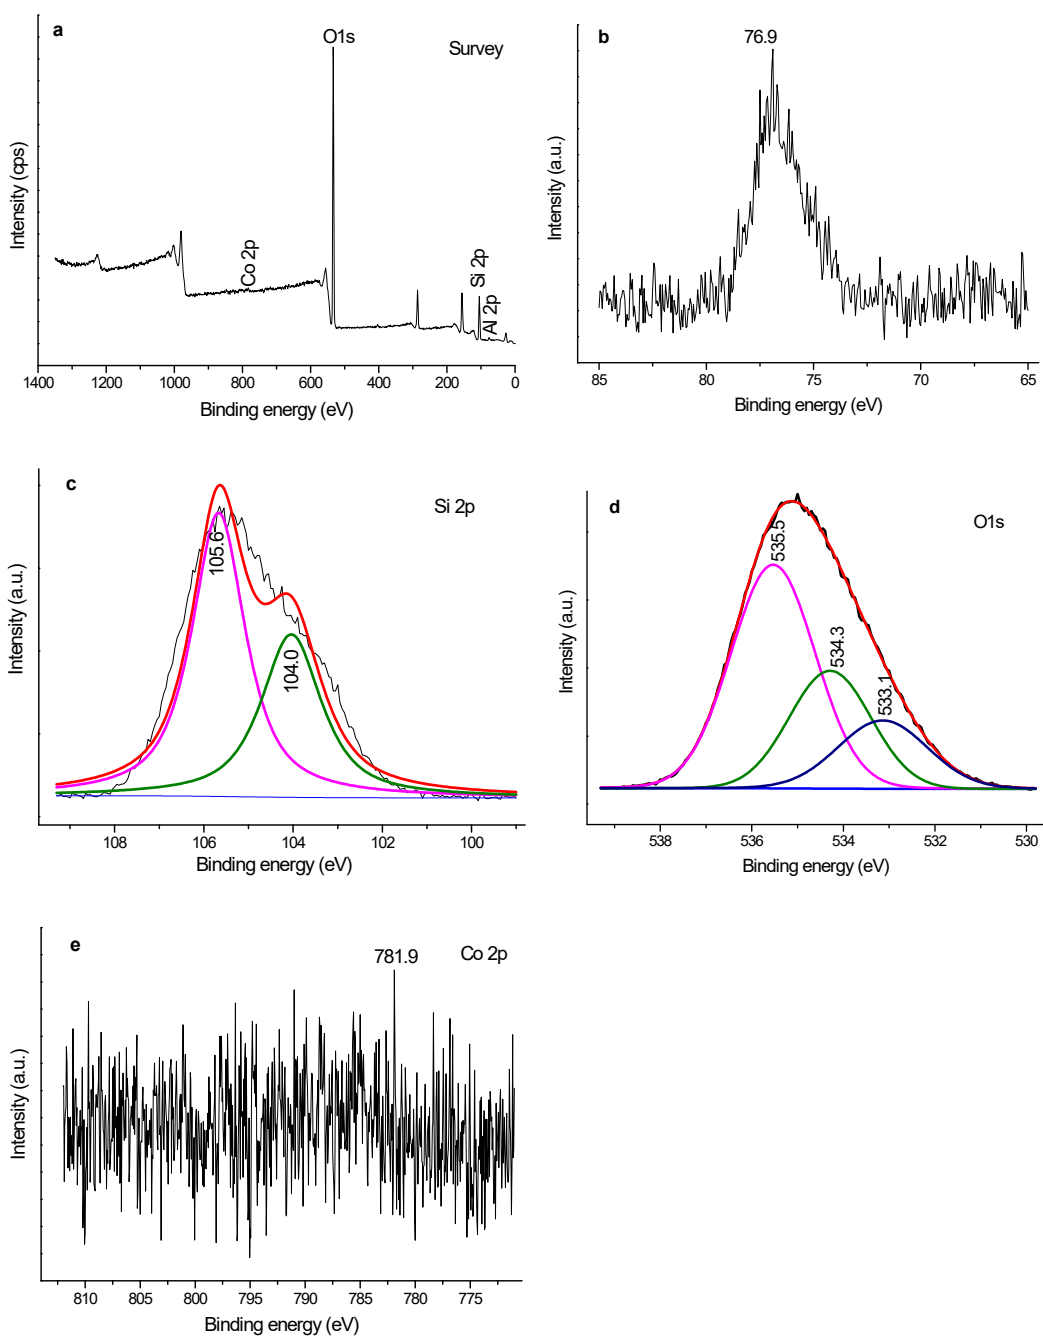

Fig. S11 XPS spectra of CoZ-450

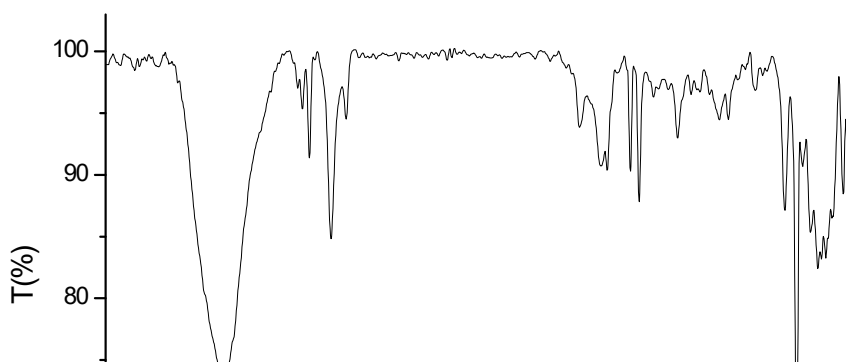

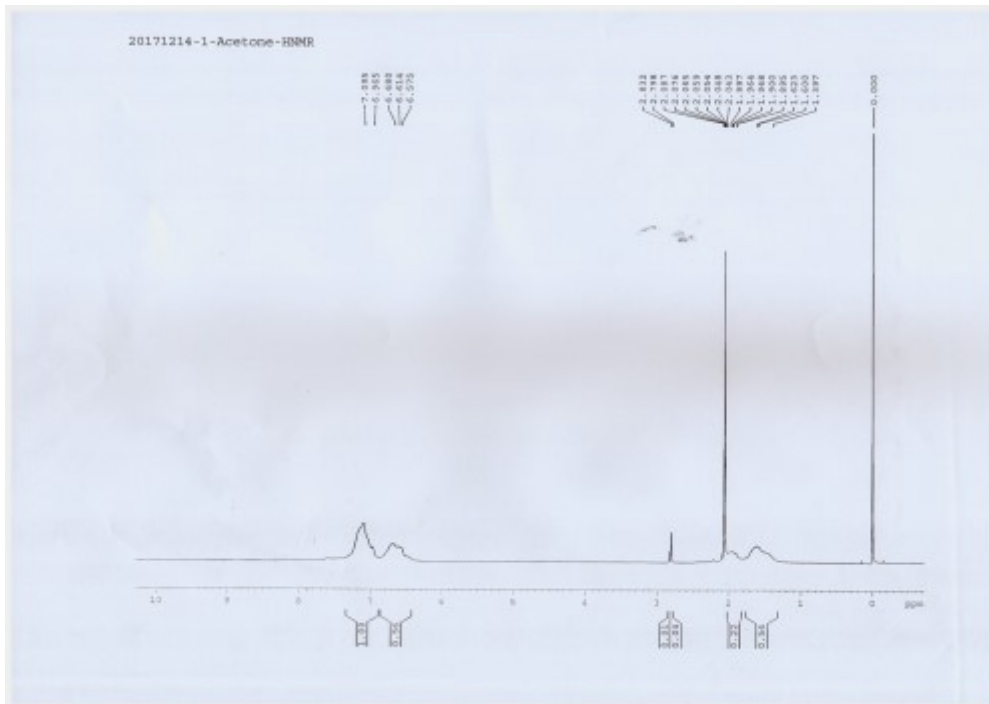

**Fig. S12** FT-IR and <sup>1</sup>H NMR spectra of the polystyrene

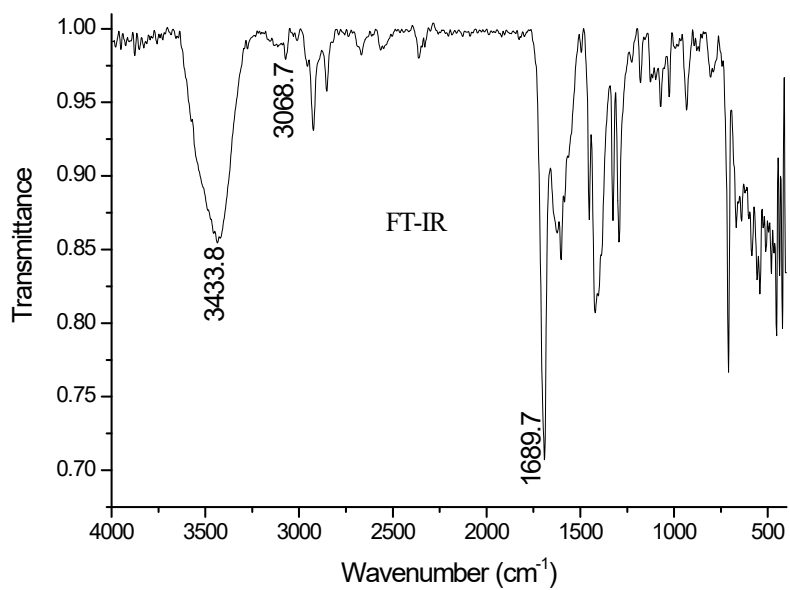

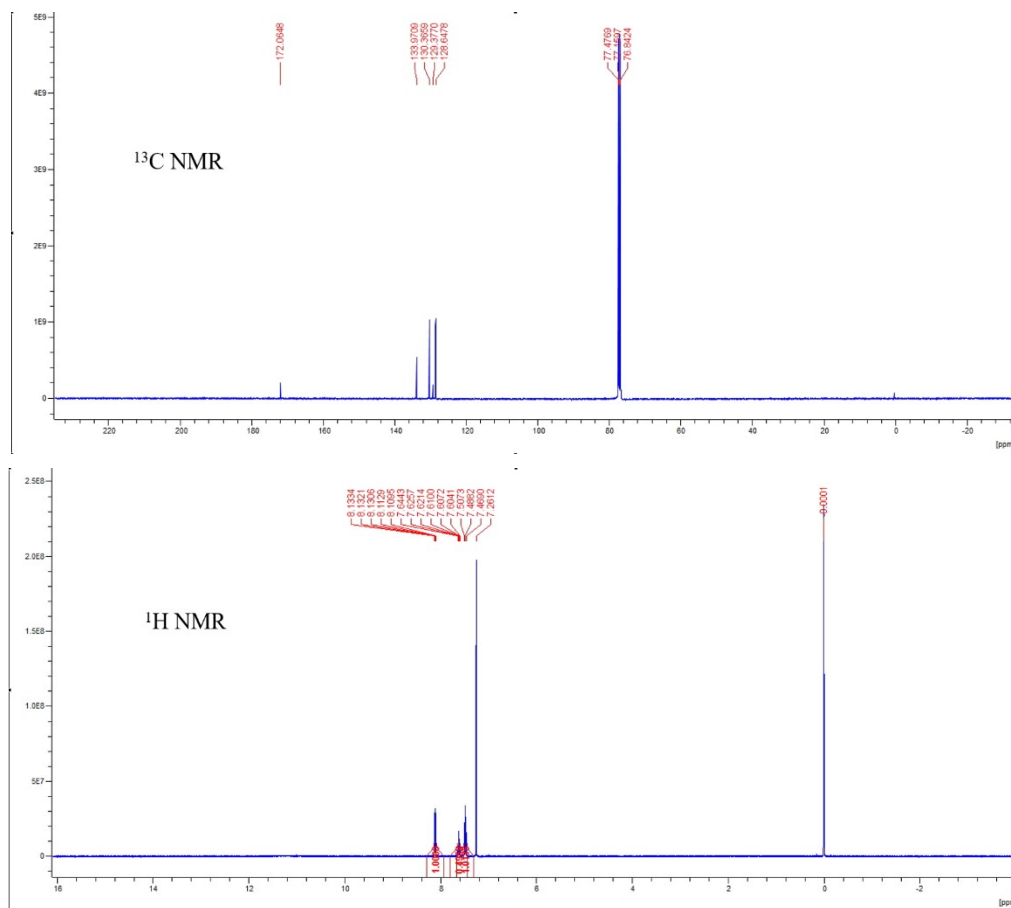

Fig. S13 FT-IR, <sup>1</sup>H NMR and <sup>13</sup>C NMR spectra of the benzoic acid
